# Supplementary material for: An unsupervised deep learning framework for predicting human essential genes from population and functional genomic data
Source: PubMed Central journal article supplement (PMC10506225; doi:10.1186/s12859-023-05481-z), 2023-09-18
Supplement: 12859_2023_5481_MOESM1_ESM.pdf [file 12859_2023_5481_MOESM1_ESM.pdf]

Supplementary material for:

An unsupervised deep learning framework for predicting  
human essential genes from population and functional  
genomic data

Troy M. LaPolice<sup>1,2,3\*</sup>, Yi-Fei Huang<sup>1,3\*</sup>

<sup>1</sup>Department of Biology, Pennsylvania State University,  
University Park, PA 16802, USA

<sup>2</sup>Bioinformatics and Genomics Graduate Program, Pennsylvania State University,  
University Park, PA 16802, USA

<sup>3</sup>Huck Institutes of the Life Sciences, Pennsylvania State University,  
University Park, PA 16802, USA

\*Correspondence to: troy.lapalice@psu.edu, yuh371@psu.edu

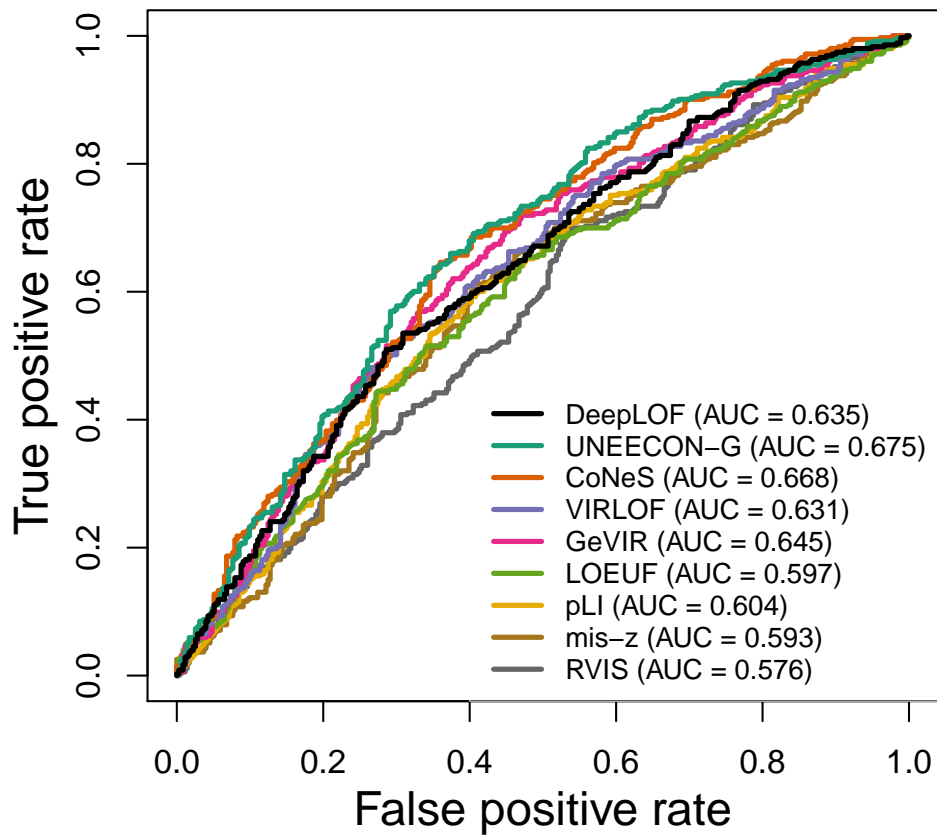

Supplementary Fig. 1: Performance of DeepLOF and alternative methods in predicting dominant negative genes.

Supplementary Table 1: Genomic features for model training.

| Feature name                        | Feature type | Log transformation | Data source |
|-------------------------------------|--------------|--------------------|-------------|
| H3K9ac signal                       | Continuous   | Yes                | [1]         |
| H3K27me3 signal                     | Continuous   | Yes                | [1]         |
| H3K4me3 signal                      | Continuous   | Yes                | [1]         |
| H2A.Z signal                        | Continuous   | Yes                | [1]         |
| Enhancer number                     | Continuous   | Yes                | [1]         |
| GO embryo development               | Binary       | N/A                | [2]         |
| GO central nervous development      | Binary       | N/A                | [2]         |
| Reactome nervous system development | Binary       | N/A                | [2]         |
| Reactome developmental biology      | Binary       | N/A                | [2]         |
| Transcription factor                | Binary       | N/A                | [3]         |
| Protein complex                     | Binary       | N/A                | [4]         |
| Promoter CpG density                | Continuous   | No                 | [5]         |
| Promoter phastCons score            | Continuous   | No                 | [5]         |
| Exonic phastCons score              | Continuous   | No                 | [5]         |
| Mean expression level               | Continuous   | Yes                | [6]         |
| Tissue specificity (tau)            | Continuous   | No                 | [6]         |
| PPI degree                          | Continuous   | Yes                | [6]         |
| UNEECON-G                           | Continuous   | No                 | [7]         |

Supplementary Table 2: Statistical significance of the differences in AUC between DeepLOF and alternative methods in predicting essential genes. The numbers represent  $P$ -values from the DeLong test. \*:  $P < 0.05$ ; \*\*:  $P < 0.01$ ; \*\*\*:  $P < 0.001$ .

| DeepLOF              | ClinGen haploin-sufficient genes | Human orthologs of mouse essential genes | Human essential genes in cell lines |
|----------------------|----------------------------------|------------------------------------------|-------------------------------------|
| <i>vs.</i> UNEECON-G | 1.332e-05 ***                    | 5.835e-04 ***                            | 5.577e-10 ***                       |
| <i>vs.</i> CoNeS     | 8.679e-04 ***                    | 3.688e-03 **                             | 4.068e-21 ***                       |
| <i>vs.</i> VIRLOF    | 6.909e-07 ***                    | 4.766e-06 ***                            | 1.260e-02 *                         |
| <i>vs.</i> GeVIR     | 1.965e-08 ***                    | 2.181e-05 ***                            | 7.913e-05 ***                       |
| <i>vs.</i> LOEUF     | 6.601e-10 ***                    | 1.073e-09 ***                            | 3.151e-12 ***                       |
| <i>vs.</i> pLI       | 1.090e-09 ***                    | 3.263e-10 ***                            | 6.640e-50 ***                       |
| <i>vs.</i> mis-z     | 8.264e-22 ***                    | 1.435e-14 ***                            | 5.962e-09 ***                       |
| <i>vs.</i> RVIS      | 8.893e-23 ***                    | 1.834e-16 ***                            | 2.067e-15 ***                       |

## References

- [1] Han, X., Chen, S., Flynn, E., Wu, S., Wintner, D., Shen, Y.: Distinct epigenomic patterns are associated with haploinsufficiency and predict risk genes of developmental disorders. *Nature Communications* **9**(1), 2138 (2018)
- [2] Liberzon, A., Subramanian, A., Pinchback, R., Thorvaldsdóttir, H., Tamayo, P., Mesirov, J.P.: Molecular signatures database (MSigDB) 3.0. *Bioinformatics* **27**(12), 1739–1740 (2011)
- [3] Barrera, L.A., Vedenko, A., Kurland, J.V., Rogers, J.M., Gisselbrecht, S.S., Rossin, E.J., Woodard, J., Mariani, L., Kock, K.H., Inukai, S., Siggers, T., Shokri, L., Gordân, R., Sahni, N., Cotsapas, C., Hao, T., Yi, S., Kellis, M., Daly, M.J., Vidal, M., Hill, D.E., Bulyk, M.L.: Survey of variation in human transcription factors reveals prevalent dna binding changes. *Science* **351**(6280), 1450–1454 (2016)
- [4] Giurgiu, M., Reinhard, J., Brauner, B., Dunger-Kaltenbach, I., Fobo, G., Frishman, G., Montrone, C., Ruepp, A.: Corum: the comprehensive resource of mammalian protein complexes–2019. *Nucleic Acids Res* **47**(D1), 559–563 (2019)
- [5] Boukas, L., Bjornsson, H.T., Hansen, K.D.: Promoter CpG density predicts downstream gene loss-of-function intolerance. *American Journal of Human Genetics* **107**(3), 487–498 (2020)
- [6] Huang, Y.-F.: Dissecting genomic determinants of positive selection with an evolution-guided regression model. *Molecular Biology and Evolution* **39**(1), 291 (2022)
- [7] Huang, Y.-F.: Unified inference of missense variant effects and gene constraints in the human genome. *PLOS Genetics* **16**(7), 1008922 (2020)
